# Supplementary material
Source: publisher site journal article supplement (https://www.dovepress.com/article/594749)
Supplement: Supplementary file 1 [file 594749%20Revised%20Supplementary%20Tables.doc]

**Table S1** Clinical and vertebral structural data in non-fractured and fractured groups in the age group of 45-60 years old

| Clinical data | 45-60 years (n=151) | | |
| --- | --- | --- | --- |
| Non-fractured (n=78) | Fractured (n=73) | *P* |
| Age, years | 55.41±2.95 | 53.58±4.43 | 0.003* |
| Male, n(%) | 46 (59) | 55 (75) | 0.050* |
| HGB, g/L | 127.10±24.20 | 122.05±22.45 | 0.187 |
| HbA1C, mmol/L | 6.77±1.88 | 6.95±1.28 | 0.491 |
| HDL, mmol/L | 1.28±0.38 | 1.15±0.32 | 0.020* |
| LDL, mmol/L | 2.70±0.76 | 2.75±0.60 | 0.620 |
| TG, mmol/L | 1.40±0.99 | 1.50±2.46 | 0.726 |
| TC, mmol/L | 4.83±1.26 | 4.53±1.40 | 0.169 |
| FFA, mmol/L | 0.45±0.28 | 0.56±0.34 | 0.026* |
| GLU, mmol/L | 5.23±1.32 | 6.19±1.75 | <0.001* |
| hCRP, mg/L | 6.58±19.67 | 19.91±51.74 | 0.036* |
| L1 cortical average area, mm2 | 387.87±141.88 | 285.16±87.96 | <0.001* |
| L1 cortical average thickness, mm | 3.25±0.43 | 2.11±0.81 | <0.001* |
| L1 cortical volume, mm3 | 10401.38±1742.69 | 7384.11±2793.49 | <0.001* |
| L1 average maximum diameter length of trabecular, µm | 19.89±9.52 | 24.62±6.24 | <0.001* |
| L1 average minimum diameter length of trabecular, µm | 17.61±4.32 | 18.28±5.22 | 0.392 |
| L1 trabecular volume, µm3 | 19301.63±4490.87 | 16095.44±6436.57 | <0.001* |

Abbreviations: hemoglobin: HGB; glycated hemoglobin: HbA1C; hypersensitive C-reactive protein: hCRP; high density lipoprotein: HDL; low density lipoprotein: LDL; triglyceride: TG; total cholesterol: TC; free fatty acid: FFA; glucose: GLU. Statistical significance was defined as **P*< 0.05.

**Table S2** Clinical and vertebral structural data in non-fractured and fractured groups in the age group of 61-70 years old

| Clinical data | 61-70 years (n=86) | | |
| --- | --- | --- | --- |
| Non-fractured (n=49) | Fractured (n=37) | *P* |
| Age, years | 65.53±2.75 | 66.14±2.69 | 0.312 |
| Male, n(%) | 24 (49) | 21 (57) | 0.619 |
| HGB, g/L | 126.78±25.30 | 121.49±19.98 | 0.298 |
| HbA1C, mmol/L | 6.89±1.45 | 6.44±1.89 | 0.216 |
| HDL, mmol/L | 1.26±0.35 | 1.29±0.32 | 0.705 |
| LDL, mmol/L | 2.66±0.75 | 2.67±0.76 | 0.925 |
| TG, mmol/L | 1.06±0.52 | 1.20±0.70 | 0.311 |
| TC, mmol/L | 4.55±1.10 | 4.56±0.94 | 0.951 |
| FFA, mmol/L | 0.51±0.30 | 0.47±0.26 | 0.489 |
| GLU, mmol/L | 6.13±1.85 | 5.45±1.10 | 0.050 |
| hCRP, mg/L | 6.68±14.74 | 5.73±13.13 | 0.757 |
| L1 cortical average area, mm2 | 331.12±64.39 | 231.60±104.74 | <0.001* |
| L1 cortical average thickness, mm | 2.96±0.52 | 1.85±0.87 | <0.001* |
| L1 cortical volume, mm3 | 9205.28±2210.73 | 5832.65±3014.50 | <0.001* |
| L1 average maximum diameter length of trabecular, µm | 17.81±9.71 | 23.08±8.63 | 0.011* |
| L1 average minimum diameter length of trabecular, µm | 14.81±6.60 | 17.94±6.48 | 0.031* |
| L1 trabecular volume, µm3 | 16858.70±5879.00 | 14871.38±9211.28 | 0.227 |

Abbreviations: hemoglobin: HGB; glycated hemoglobin: HbA1C; hypersensitive C-reactive protein: hCRP; high density lipoprotein: HDL; low density lipoprotein: LDL; triglyceride: TG; total cholesterol: TC; free fatty acid: FFA; glucose: GLU. Statistical significance was defined as **P* < 0.05.

**Table S3** Clinical and vertebral structural data in non-fractured and fractured groups in the age group of >70 years old

| Clinical data | >70 years (n=61) | | |
| --- | --- | --- | --- |
| Non-fractured (n=37) | Fractured (n=24) | *P* |
| Age, years | 76.19±4.21 | 77.67±5.47 | 0.239 |
| Male, n(%) | 20 (54) | 16 (67) | 0.476 |
| HGB, g/L | 118.68±28.34 | 114.88±21.09 | 0.576 |
| HbA1C, mmol/L | 6.94±1.92 | 7.35±1.88 | 0.409 |
| HDL, mmol/L | 1.26±0.36 | 1.20±0.22 | 0.455 |
| LDL, mmol/L | 2.77±1.01 | 2.70±0.85 | 0.777 |
| TG, mmol/L | 1.57±1.77 | 1.52±1.45 | 0.920 |
| TC, mmol/L | 4.38±1.06 | 4.42±1.19 | 0.892 |
| FFA, mmol/L | 0.55±0.28 | 0.56±0.20 | 0.918 |
| GLU, mmol/L | 5.80±2.08 | 6.36±2.21 | 0.317 |
| hCRP, mg/L | 4.64±7.98 | 8.26±20.67 | 0.340 |
| L1 cortical average area, mm2 | 307.33±85.46 | 144.58±78.53 | <0.001* |
| L1 cortical average thickness, mm | 2.79±0.56 | 1.28±0.71 | <0.001* |
| L1 cortical volume, mm3 | 8755.09±2277.09 | 3456.92±2371.30 | <0.001* |
| L1 average maximum diameter length of trabecular, µm | 16.16±9.91 | 21.41±10.74 | 0.055 |
| L1 average minimum diameter length of trabecular, µm | 11.70±7.62 | 13.42±8.02 | 0.401 |
| L1 trabecular volume, µm3 | 14896.90±7543.00 | 21731.99±58146.72 | 0.481 |

Abbreviations: hemoglobin: HGB; glycated hemoglobin: HbA1C; hypersensitive C-reactive protein: hCRP; high density lipoprotein: HDL; low density lipoprotein: LDL; triglyceride: TG; total cholesterol: TC; free fatty acid: FFA; glucose: GLU. Statistical significance was defined as **P* < 0.05.

**Table S4 Exploratory age-stratified discrimination of the final nomogram score in the overall cohort**

| **Age group** | **Total n** | **Non-fractured n** | **Fractured n** | **AUC (95% CI)** |
| --- | --- | --- | --- | --- |
| 45-60 years | 151 | 78 | 73 | 0.885 (0.827-0.935) |
| 61-70 years | 86 | 49 | 37 | 0.873 (0.792-0.943) |
| >70 years | 61 | 37 | 24 | 0.935 (0.840-0.995) |

Note: Age-stratified discrimination was calculated exploratorily using the final nomogram score in the overall cohort. These subgroup estimates should be interpreted cautiously because of limited stratum-specific sample sizes.

Abbreviations: area under the curve: AUC; confidence interval: CI.
